# Supplementary material for: New and Poorly Known Species of Peniagone (Holothuroidea, Elpidiidae) from the Northwest Pacific Ocean with Discussion on Phylogeny of the Genus
Source: MDPI journal article supplement (doi:10.3390/d13110541), 2021-10-28
Supplement: s1 [file s1]

**Table S1.** Specimen list with GenBank Accession numbers and data on their sampling, storage and sequences

| Species                    | ID on tree                    |                | Repository | Specimen ID       | Area  | Latitude | Longitude | Depth, m | GenBank Acc. Number |                                                | COI Primers                                   | 16S Primers | Sequence length, bp |     |
|----------------------------|-------------------------------|----------------|------------|-------------------|-------|----------|-----------|----------|---------------------|------------------------------------------------|-----------------------------------------------|-------------|---------------------|-----|
|                            |                               |                |            |                   |       |          |           |          | COI                 | 16S                                            |                                               |             | COI                 | 16S |
|                            |                               |                |            |                   |       |          |           |          |                     |                                                |                                               |             |                     |     |
| <i>Elpidia kurilensis</i>  | <i>Elpidia kurilensis</i>     | IORAS ECH01814 | KB2_987_1  | northwest Pacific | 45.65 | 152.95   | 7154      | MZ563466 | MZ563445            | LCOech1aF1 <sup>a</sup> , HCO2198 <sup>b</sup> | 16sfHolo <sup>g</sup> , 16srHolo <sup>h</sup> | 658         | 327                 |     |
| <i>Peniagone azorica</i>   | <i>Peniagone azorica</i> F62  | NOCS           | ECOMAR_F62 | North Atlantic    | 54.00 | -34.18   | 2500      | -        | MZ563455            | -                                              | 16sfHolo <sup>g</sup> , 16srHolo <sup>h</sup> | -           | 326                 |     |
| <i>Peniagone azorica</i>   | <i>Peniagone azorica</i> F63  | NOCS           | ECOMAR_F63 | North Atlantic    | 54.00 | -34.18   | 2500      | -        | MZ563458            | -                                              | 16sfHolo <sup>g</sup> , 16srHolo <sup>h</sup> | -           | 326                 |     |
| <i>Peniagone azorica</i>   | <i>Peniagone azorica</i> F64  | NOCS           | ECOMAR_F64 | North Atlantic    | 54.00 | -34.18   | 2500      | -        | MZ563449            | -                                              | 16sfHolo <sup>g</sup> , 16srHolo <sup>h</sup> | -           | 303                 |     |
| <i>Peniagone azorica</i>   | <i>Peniagone azorica</i> F66  | NOCS           | ECOMAR_F66 | North Atlantic    | 54.00 | -34.18   | 2500      | -        | MZ563451            | -                                              | 16sfHolo <sup>g</sup> , 16srHolo <sup>h</sup> | -           | 326                 |     |
| <i>Peniagone coccinea</i>  | <i>Peniagone coccinea</i> B30 | NOCS           | ECOMAR_B30 | North Atlantic    | 48.97 | -27.85   | 2600      | MZ563467 | MZ563446            | COIf <sup>c</sup> , COIr <sup>d</sup>          | 16sfHolo <sup>g</sup> , 16srHolo <sup>h</sup> | 654         | 365                 |     |
| <i>Peniagone coccinea</i>  | <i>Peniagone coccinea</i> D42 | NOCS           | ECOMAR_D42 | North Atlantic    | 48.97 | -27.85   | 2600      | MZ563477 | MZ563461            | COIf <sup>c</sup> , COIr <sup>d</sup>          | 16sfHolo <sup>g</sup> , 16srHolo <sup>h</sup> | 654         | 365                 |     |
| <i>Peniagone islandica</i> | <i>Peniagone islandica</i> B4 | NOCS           | ECOMAR_B4  | North Atlantic    | 48.97 | -27.85   | 2600      | -        | MZ563456            | -                                              | 16sfHolo <sup>g</sup> , 16srHolo <sup>h</sup> | -           | 326                 |     |
| <i>Peniagone islandica</i> | <i>Peniagone islandica</i>    | NOCS           | ECOMAR_B12 | North Atlantic    | 48.97 | -27.85   | 2600      | -        | MZ56346             | -                                              | 16sfHolo <sup>g</sup> , 16srHolo <sup>h</sup> | -           | 326                 |     |

|                                         |                                                     |                   |                   |                                      |       |            |      |                       |                  |                                                                                   |                                      |     |     |
|-----------------------------------------|-----------------------------------------------------|-------------------|-------------------|--------------------------------------|-------|------------|------|-----------------------|------------------|-----------------------------------------------------------------------------------|--------------------------------------|-----|-----|
|                                         | B12                                                 |                   |                   |                                      |       |            |      | 0                     |                  |                                                                                   |                                      |     |     |
| <i>Peniagone islandica</i>              | <i>Peniagone islandica</i><br>H30                   | NOCS              | ECOMAR_H30        | North Atlantic                       | 48.97 | -27.85     | 2600 | -                     | MZ5<br>6345<br>4 | -                                                                                 | 16sfHolog,<br>16srHolog <sup>h</sup> | -   | 293 |
| <i>Peniagone islandica</i>              | <i>Peniagone islandica</i><br>H33                   | NOCS              | ECOMAR_H33        | North Atlantic                       | 48.97 | -27.85     | 2600 | MZ5<br>6347<br>0      | -                | COIf <sup>c</sup> , COIr <sup>d</sup>                                             | -                                    | 654 | -   |
| <i>Peniagone islandica</i>              | <i>Peniagone islandica</i><br>H50                   | NOCS              | ECOMAR_H50        | North Atlantic                       | 48.97 | -27.85     | 2600 | MZ5<br>6346<br>5<br>4 | MZ5<br>6344      | COIf <sup>c</sup> , COIr <sup>d</sup>                                             | 16sfHolog,<br>16srHolog <sup>h</sup> | 654 | 321 |
| <i>Peniagone mus</i>                    | <i>Peniagone mus</i><br>ECH02148                    | IORAS<br>ECH02148 | KB2_744<br>_1     | northwest<br>Pacific                 | 45.94 | 152.8<br>8 | 6185 | MZ5<br>6347<br>5      | MZ5<br>6345<br>9 | LCOech1aF1 <sup>a</sup> ,<br>HCO2198 <sup>b</sup>                                 | 16sfHolog,<br>16srHolog <sup>h</sup> | 658 | 326 |
| <i>Peniagone mus</i>                    | <i>Peniagone mus</i><br>ECH01808                    | IORAS<br>ECH01808 | KB2_744<br>_2     | northwest<br>Pacific                 | 45.94 | 152.8<br>8 | 6185 | MZ5<br>6346<br>8      | MZ5<br>6344<br>7 | LCOech1aF1 <sup>a</sup> ,<br>HCO2198 <sup>b</sup>                                 | 16sfHolog,<br>16srHolog <sup>h</sup> | 658 | 326 |
| <i>Peniagone mus</i>                    | <i>Peniagone mus</i><br>ECH01812                    | IORAS<br>ECH01812 | KB2_745<br>_1     | northwest<br>Pacific                 | 45.94 | 152.8<br>8 | 6185 | MZ5<br>6347<br>3      | MZ5<br>6345<br>3 | LCOech1aF1 <sup>a</sup> ,<br>HCO2198 <sup>b</sup> ; COIeFe,<br>COIeR <sup>i</sup> | 16sfHolog,<br>16srHolog <sup>h</sup> | 841 | 326 |
| <i>Peniagone mus</i>                    | <i>Peniagone mus</i><br>ECH01813                    | IORAS<br>ECH01813 | Pen_L_1<br>0_7_2  | northwest<br>Pacific                 | 46.10 | 152.2<br>4 | 4769 | MZ5<br>6347<br>6      | -                | LCOech1aF1 <sup>a</sup> ,<br>HCO2198 <sup>b</sup>                                 | -                                    | 658 | -   |
| <i>Peniagone</i><br><i>cf. purpurea</i> | <i>Peniagone</i><br><i>cf. purpurea</i><br>ECH01810 | IORAS<br>ECH01810 | SO223-1-<br>13_H3 | northwest<br>Pacific                 | 43.97 | 157.2<br>6 | 5427 | MZ5<br>6347<br>4      | MZ5<br>6345<br>7 | LCOech1aF1 <sup>a</sup> ,<br>HCO2198 <sup>b</sup>                                 | 16sfHolog,<br>16srHolog <sup>h</sup> | 658 | 329 |
| <i>Peniagone</i><br><i>cf. purpurea</i> | <i>Peniagone</i><br><i>cf. purpurea</i><br>ECH01811 | IORAS<br>ECH01811 | KB_113_<br>1      | northwest<br>Pacific                 | 43.97 | 157.3<br>2 | 5422 | MZ5<br>6346<br>9      | MZ5<br>6344<br>8 | LCOech1aF1 <sup>a</sup> ,<br>HCO2198 <sup>b</sup> ; COIeFe,<br>COIeR <sup>i</sup> | 16sfHolog,<br>16srHolog <sup>h</sup> | 841 | 329 |
| <i>Peniagone saveljevae</i>             | <i>Peniagone saveljevae</i><br>ECH02151             | IORAS<br>ECH02151 | PenL1-<br>11      | Okhotsk Sea,<br>northwest<br>Pacific | 46.15 | 146.0<br>1 | 3305 | -                     | MZ5<br>6344<br>2 | -                                                                                 | 16sfHolog,<br>16srHolog <sup>h</sup> | -   | 326 |
| <i>Peniagone</i>                        | <i>Peniagone</i>                                    | IORAS             | KB_2077           | northwest                            | 42.49 | 154.0      | 5293 | MZ5                   | MZ5              | LCOech1aF1 <sup>a</sup> ,                                                         | 16sfHolog,                           | 841 | 326 |

|                                      |                                        |                   |               |                      |        |            |      |                  |                  |                                                                   |                                                  |     |     |
|--------------------------------------|----------------------------------------|-------------------|---------------|----------------------|--------|------------|------|------------------|------------------|-------------------------------------------------------------------|--------------------------------------------------|-----|-----|
| sp.<br>"miniatura<br>"               | sp.<br>"miniatur<br>a"                 | ECH01809          | _1            | Pacific              |        | 0          |      | 6346<br>4        | 6344<br>3        | HCO2198 <sup>b</sup> ; COIeF <sup>e</sup> ,<br>COIeR <sup>f</sup> | 16srHolo <sup>h</sup>                            |     |     |
| <i>Peniagone</i><br>sp.              | <i>Peniagone</i><br>sp.<br>ECH00852    | IORAS<br>ECH00852 | ECH008<br>52  | Antarctic            | -64.02 | -39.15     | 4780 | MZ5<br>6347<br>1 | MZ5<br>6345<br>0 | COIeF <sup>c</sup> , COIeR <sup>f</sup>                           | 16sfHolo <sup>g</sup> ,<br>16srHolo <sup>h</sup> | 652 | 327 |
| <i>Peniagone</i><br>sp.              | <i>Peniagone</i><br>sp. ZMBN<br>140277 | ZMBN<br>140277    | ZMBN_<br>PE30 | Antarctic            | -68.46 | 11.52      | 1730 | MZ5<br>6344<br>0 | MZ5<br>6343<br>7 | LCOech1aF1 <sup>a</sup> ,<br>HCO2198 <sup>b</sup>                 | 16sfHolo <sup>g</sup> ,<br>16sbrH <sup>i</sup>   | 658 | 413 |
| <i>Peniagone</i><br>sp.              | <i>Peniagone</i><br>sp. ZMBN<br>140278 | ZMBN<br>140278    | ZMBN_<br>PE31 | Antarctic            | -68.46 | 11.52      | 1730 | MZ5<br>6344<br>1 | MZ5<br>6343<br>8 | LCOech1aF1 <sup>a</sup> ,<br>HCO2198 <sup>b</sup>                 | 16sfHolo <sup>g</sup> ,<br>16sbrH                | 658 | 413 |
| <i>Peniagone</i><br>sp.              | <i>Peniagone</i><br>sp. ZMBN<br>140279 | ZMBN<br>140279    | ZMBN_<br>PE32 | Antarctic            | -68.87 | 11.85      | 1090 | -<br>6343<br>9   | MZ5<br>6343<br>9 | -                                                                 | 16sfHolo <sup>g</sup> ,<br>16sbrH                | -   | 358 |
| <i>Scotoplanes</i><br><i>hanseni</i> | <i>Scotoplane</i><br><i>s hanseni</i>  | IORAS<br>ECH01815 | KB2_637<br>_1 | northwest<br>Pacific | 45.95  | 152.8<br>8 | 6183 | MZ5<br>6347<br>2 | MZ5<br>6345<br>2 | LCOech1aF1 <sup>a</sup> ,<br>HCO2199 <sup>b</sup>                 | 16sfHolo <sup>g</sup> ,<br>16srHolo <sup>h</sup> | 658 | 323 |

<sup>a</sup> LCOech1aF1 [28] 5'-TTTTTCTACTAAACACAAGGATATTGG-3'; <sup>b</sup> HCO2198 [26] 5'-TAAACTTCAGGGTGACCAAAAAATCA-3'; <sup>c</sup> COIeF [27] 5'-ACTGCCCACGCCCTAGCAATGATATTTTTTATGGTNATGC-3'; <sup>d</sup> COIeR [27] 5'-TCGTGTGTCTACGTCCATTCTACTCTRAACATRTG-3'; <sup>e</sup> COIeF [25] 5'-ATAATGATAGGAGGRTTGG-3'; <sup>f</sup> COIeR [25] 5'-GCTCGTGTRTCTACRTCCAT-3'; <sup>g</sup> 16sfHolo (designed in this study by C.A.) 5'-TGACCGTGCAAAGGTAGC-3'; <sup>h</sup> 16srHolo (designed in this study by C.A.) 5'-GAGGTCGCAAACCCTTCT-3'; <sup>i</sup> 16sbrH [29] 5'-CCGGTCTGAACTCAGATCACGT-3'.

**Table S2.** List of sequences obtained from GenBank and BOLD

| Species                   | ID on phylogenetic trees            | GenBank accession number/BOLD process ID |          |
|---------------------------|-------------------------------------|------------------------------------------|----------|
|                           |                                     | COI                                      | 16S      |
| <i>Amperima robusta</i>   | <i>Amperima robusta</i>             | KX874381                                 | KX856728 |
| <i>Elpidia glacialis</i>  | <i>Elpidia glacialis</i>            | HM196429                                 | -        |
| <i>Peniagone diaphana</i> | <i>Peniagone diaphana</i>           | KX874384                                 | KX856725 |
| <i>Peniagone incerta</i>  | <i>Peniagone incerta</i> MOLN114    | HM196398                                 | -        |
| <i>Peniagone incerta</i>  | <i>Peniagone incerta</i> MOLN115    | HM196399                                 | -        |
| <i>Peniagone incerta</i>  | <i>Peniagone incerta</i> MOLAF720   | HM196400                                 | -        |
| <i>Peniagone incerta</i>  | <i>Peniagone incerta</i> MOLAF764   | HM196401                                 | -        |
| <i>Peniagone incerta</i>  | <i>Peniagone incerta</i> MOLAF761   | HM196402                                 | -        |
| <i>Peniagone leander</i>  | <i>Peniagone leander</i>            | -                                        | MN567717 |
| <i>Peniagone vignoni</i>  | <i>Peniagone vignoni</i> MOLAF748   | HM196381                                 | -        |
| <i>Peniagone vignoni</i>  | <i>Peniagone vignoni</i> MOLAF721   | HM196382                                 | -        |
| <i>Peniagone vignoni</i>  | <i>Peniagone vignoni</i> MOLG073    | HM196383                                 | -        |
| <i>Peniagone vignoni</i>  | <i>Peniagone vignoni</i> MOLN098    | HM196384                                 | -        |
| <i>Peniagone vignoni</i>  | <i>Peniagone vignoni</i> MOLG074    | HM196385                                 | -        |
| <i>Peniagone vignoni</i>  | <i>Peniagone vignoni</i> MOLAF755   | HM196386                                 | -        |
| <i>Peniagone vignoni</i>  | <i>Peniagone vignoni</i> MOLAF724   | HM196387                                 | -        |
| <i>Peniagone vignoni</i>  | <i>Peniagone vignoni</i> MOLAF725   | HM196388                                 | -        |
| <i>Peniagone vignoni</i>  | <i>Peniagone vignoni</i> MOLAF763   | HM196389                                 | -        |
| <i>Peniagone vignoni</i>  | <i>Peniagone vignoni</i> MOLAF744   | HM196390                                 | -        |
| <i>Peniagone vignoni</i>  | <i>Peniagone vignoni</i> MOLAF749   | HM196391                                 | -        |
| <i>Peniagone vignoni</i>  | <i>Peniagone vignoni</i> MOLG075    | HM196392                                 | -        |
| <i>Peniagone vignoni</i>  | <i>Peniagone vignoni</i> MOLN096    | HM196393                                 | -        |
| <i>Peniagone vignoni</i>  | <i>Peniagone vignoni</i> MOLAF727   | HM196394                                 | -        |
| <i>Peniagone vignoni</i>  | <i>Peniagone vignoni</i> MOLAF738   | HM196395                                 | -        |
| <i>Peniagone vignoni</i>  | <i>Peniagone vignoni</i> MOLN099    | HM196396                                 | -        |
| <i>Peniagone vignoni</i>  | <i>Peniagone vignoni</i> MOLN097    | HM196397                                 | -        |
| <i>Peniagone vignoni</i>  | <i>Peniagone vignoni</i> NZEC252-08 | NZEC252-08                               | -        |

|                            |                                                  |            |          |
|----------------------------|--------------------------------------------------|------------|----------|
| <i>Peniagone vignoni</i>   | <i>Peniagone vignoni</i> NZEC254-08              | NZEC254-08 | -        |
| <i>Peniagone vignoni</i>   | <i>Peniagone vignoni</i> NZEC255-08              | NZEC255-08 | -        |
| <i>Peniagone vignoni</i>   | <i>Peniagone vignoni</i> NZEC251-08              | NZEC251-08 | -        |
| <i>Peniagone vignoni</i>   | <i>Peniagone vignoni</i> NZEC253-08              | NZEC253-08 | -        |
| <i>Peniagone</i> sp.       | <i>Peniagone</i> sp. YYH-2013                    | KF915304   | KF915304 |
| <i>Peniagone</i> sp.       | <i>Peniagone</i> sp. SIO-BIC E5608               | KX874385   | KX856726 |
| <i>Peniagone</i> sp.       | <i>Peniagone</i> sp. NZEC232-08                  | NZEC232-08 |          |
| <i>Peniagone</i> sp.       | <i>Peniagone</i> sp. NZEC235-08                  | NZEC235-08 | -        |
| <i>Peniagone</i> sp.       | <i>Peniagone</i> sp. NZEC236-08                  | NZEC236-08 | -        |
| <i>Protelpidia murrayi</i> | <i>Protelpidia murrayi</i><br>Echinoderm1B1_St42 | KF713386   | KF713450 |
| <i>Protelpidia murrayi</i> | <i>Protelpidia murrayi</i> SIO-BIC<br>E5110      | -          | KX856727 |
| <i>Scotoplanes</i> sp.     | <i>Scotoplanes</i> sp.                           | LC416624   | LC416624 |
