# Supplementary figures and images for: New and Poorly Known Species of Peniagone (Holothuroidea, Elpidiidae) from the Northwest Pacific Ocean with Discussion on Phylogeny of the Genus
Source: MDPI journal article supplement (doi:10.3390/d13110541), 2021-10-28

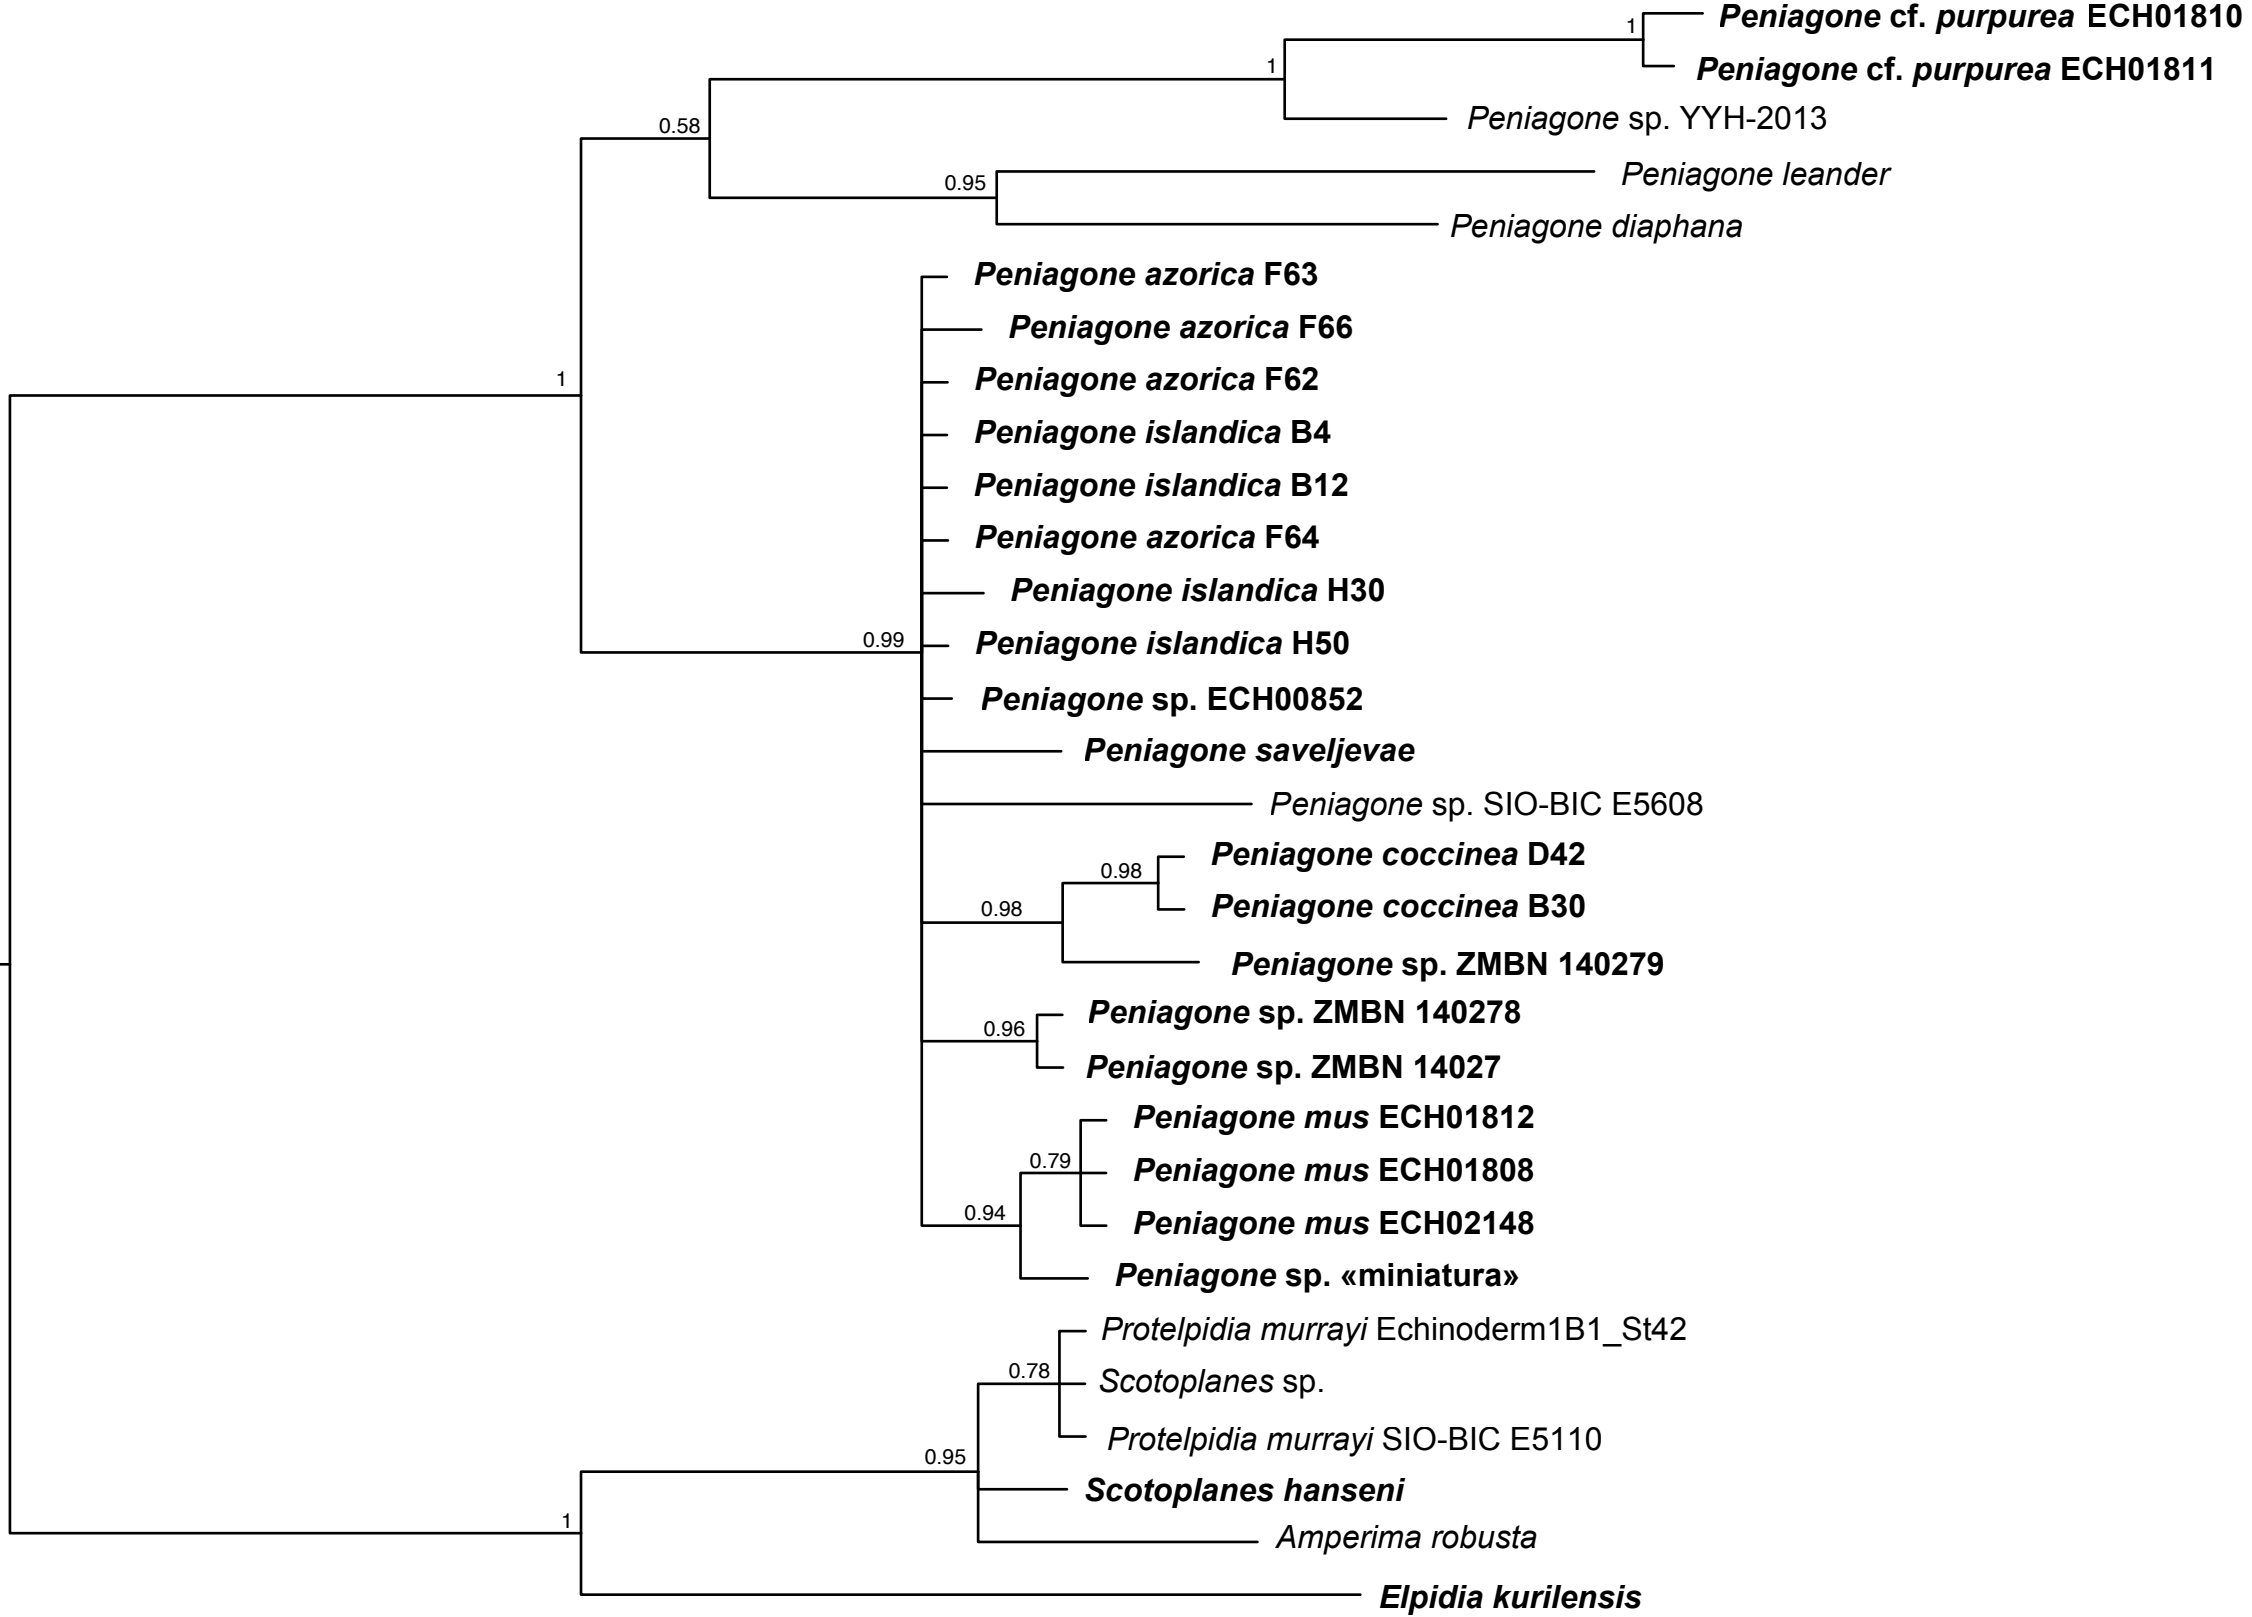

0.03

Supplement: s1 [file s1]
